# Supplementary material for: Should I use fixed effects or random effects when I have fewer than five levels of a grouping factor in a mixed-effects model?
Source: PeerJ journal article supplement (doi:10.7717/peerj.12794), 2022-01-20

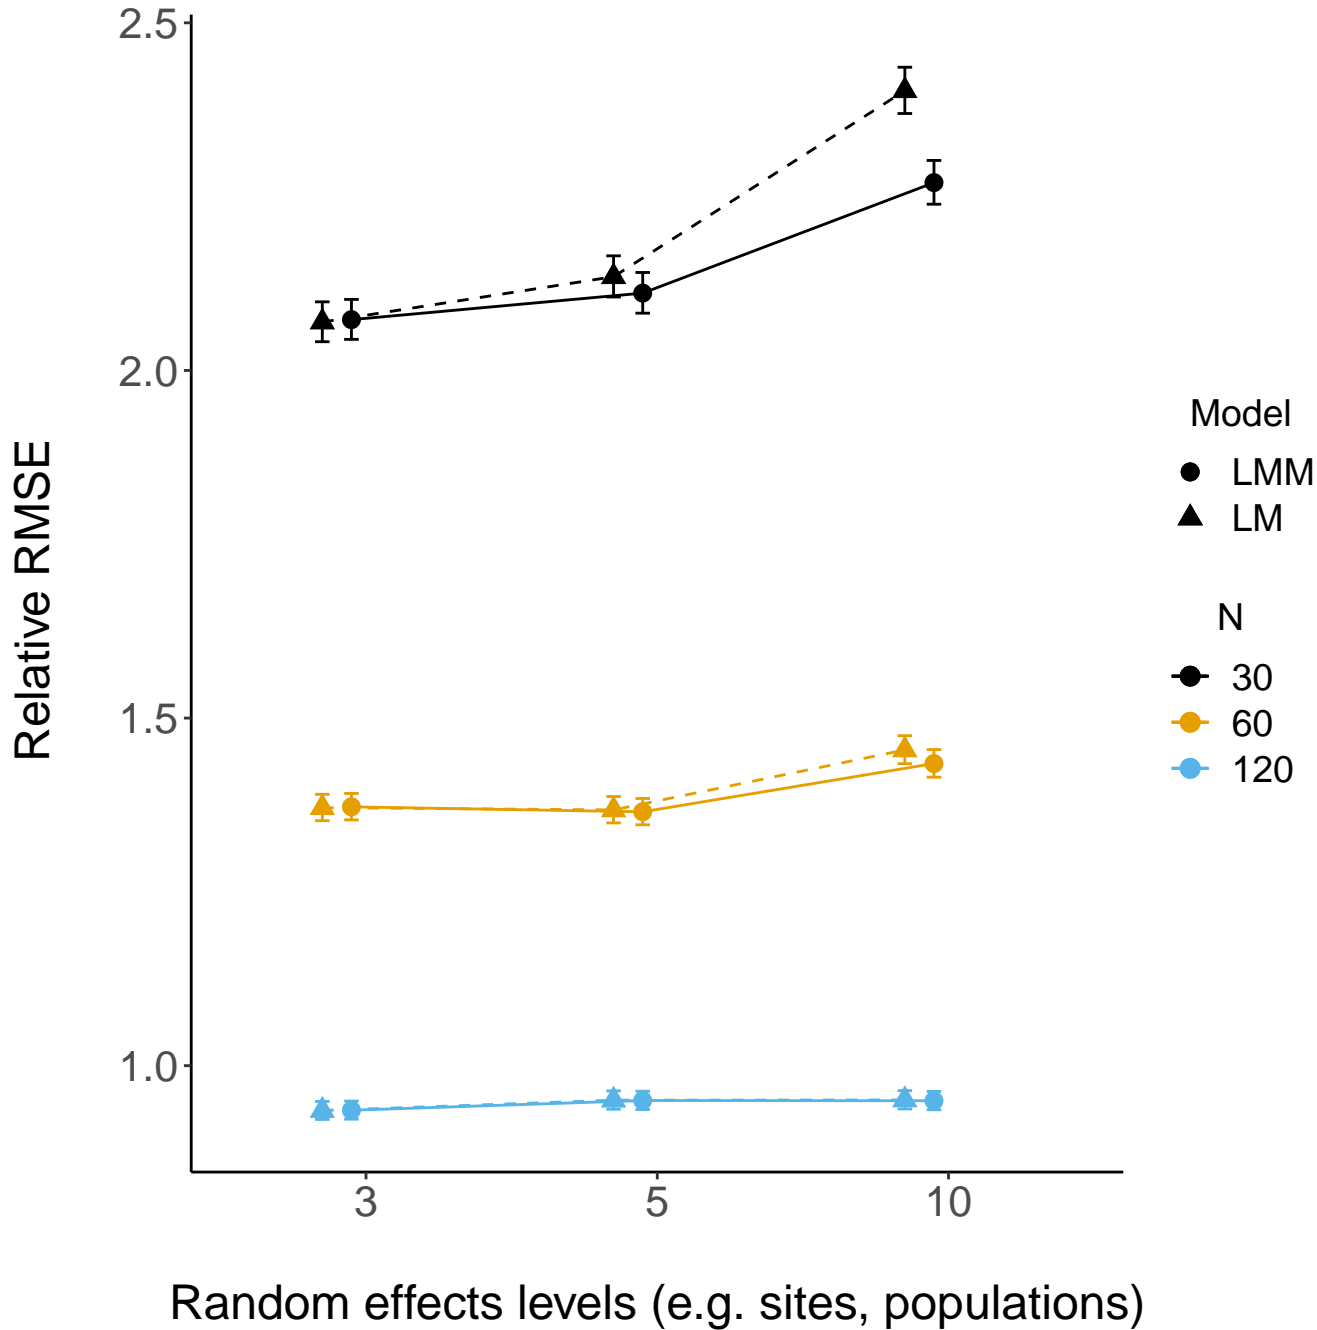

Supplement: FigureS2_RMSE_wk.pdf [file FigureS2_RMSE_wk.pdf]
